# Supplementary material
Source: PubMed Central journal article supplement (PMC6214474)
Supplement: NIHMS1504917-supplement-1.pdf [file NIHMS1504917-supplement-1.pdf]

## **Supplementary Information**

### **ZFX mediates non-canonical oncogenic functions of the androgen receptor splice variant 7 (AR-V7) in castrate-resistant prostate cancer**

Ling Cai, Yi-Hsuan Tsai, Ping Wang, Jun Wang, Dongxu Li, Huitao Fan, Yilin Zhao, Rui Lu, Rohan Bareja, Elizabeth M. Wilson, Andrea Sboner, Young E. Whang, Deyou Zheng, Joel S. Parker, H. Shelton Earp, Gang Greg Wang

Fig. S1

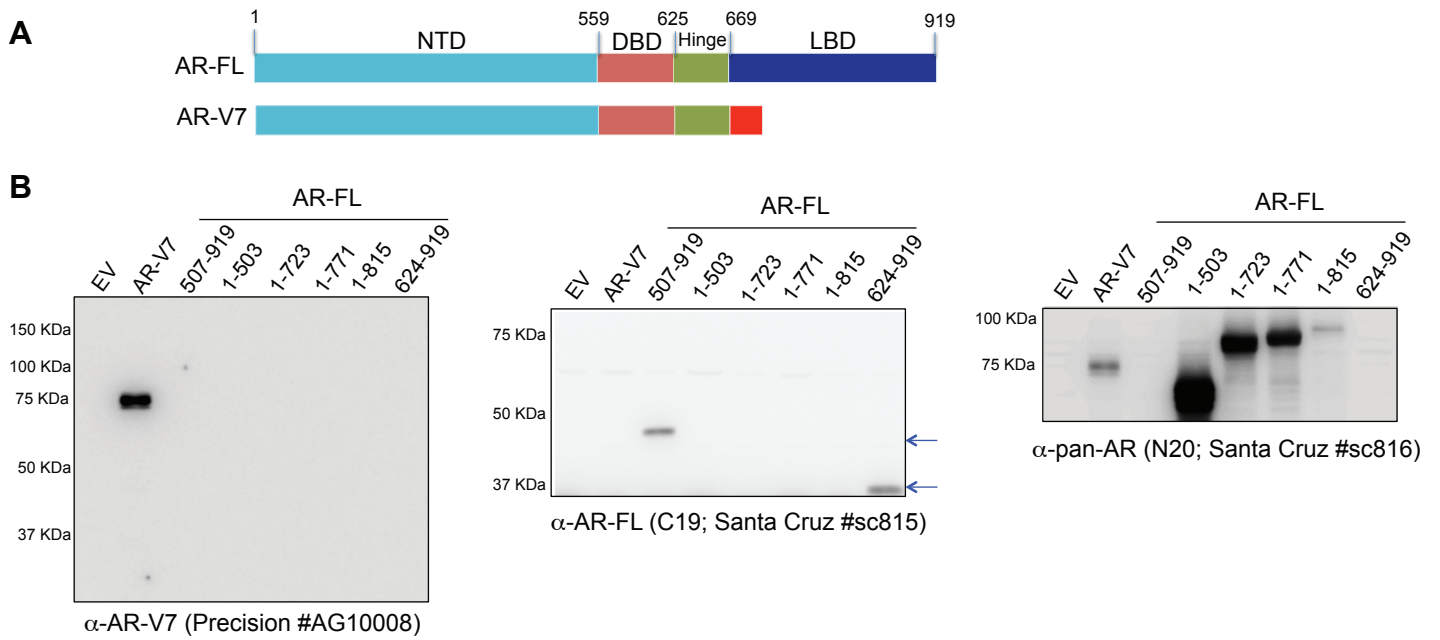

**C** Summary of ChIP-Seq read depth for the AR-FL, AR-V7 and BRD4 in 22RV1 and VCaP cells.

| 22Rv1   |                          |                      | VCaP       |                          |                          |            |
|---------|--------------------------|----------------------|------------|--------------------------|--------------------------|------------|
| Epitope | Cell treatment           | Total # of raw Reads | Epitope    | Cell treatment           | Total # of raw Reads     |            |
| AR-FL   | vehicle (ligand-starved) | 58,492,066           | AR-FL      | vehicle (ligand-starved) | 37,382,769               |            |
|         | DHT                      | 39,764,623           |            | DHT                      | 70,997,428               |            |
|         | C-terminus               | DHT plus JQ1         | 54,095,717 | AR-V7                    | vehicle (ligand-starved) | 36,267,228 |
|         |                          | DHT plus MDV3100     | 38,917,269 |                          | DHT                      | 48,199,211 |
| AR-V7   | vehicle (ligand-starved) | 66,521,128           | BRD4       | vehicle (ligand-starved) | 18,682,596               |            |
|         | DHT                      | 38,584,063           |            | DHT                      | 21,857,948               |            |
|         | C-terminus               | DHT plus JQ1         |            | 54,418,919               | DHT plus JQ1             | 20,854,481 |
|         |                          | DHT plus MDV3100     |            | 45,804,204               | DHT plus MDV3100         | 24,138,480 |

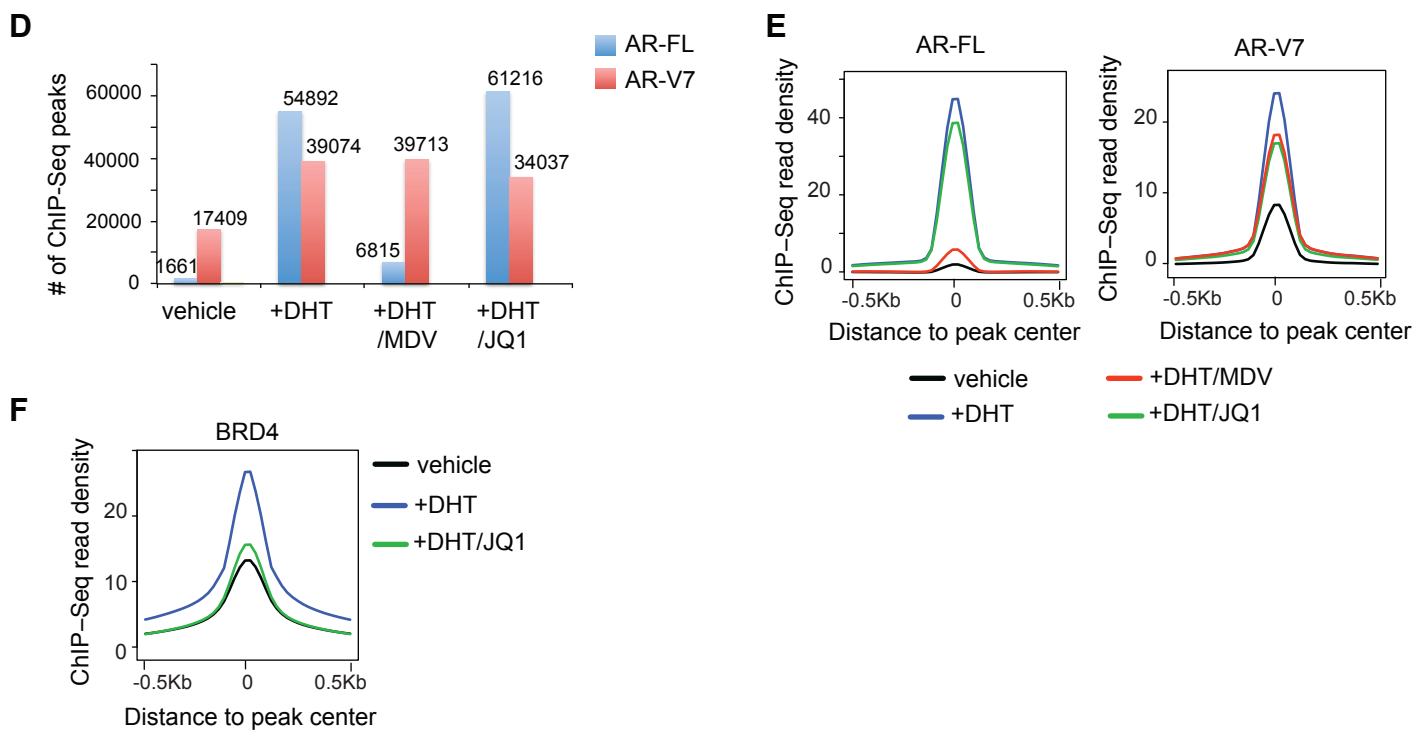

**Figure S1. Summary and overview of ChIP-Seq peaks of endogenous AR-FL, AR-V7 and BRD4 in the 22Rv1 and VCaP cell models of castrate-resistant prostate cancer (CRPC), Related to Figure 1**

**(A)** Protein domain structure of AR-FL and AR-V7. NTD, N-terminal transactivation domain; DBD, DNA-binding domain; LBD, ligand-binding domain.

**(B)** Immunoblotting of total extracts of 293 cells transfected with 1  $\mu$ g of each of the indicated AR-V7/FL wild-type or serial deletion plasmids with either AR-V7-specific (left), AR-FL-specific (middle) or pan-AR (right) antibody. EV, empty vector.

**(C)** Summary of the number of the ChIP-seq read tags for the AR-FL, AR-V7 and BRD4 in 22Rv1 (left) and VCaP (right) cells under the indicated treatment conditions for 6 hours.

**(D)** Total number of the called AR-FL and AR-V7 ChIP-Seq peaks in 22Rv1 cells that were cultured in the ligand-stripped medium followed by treatment with either vehicle, 10 nM of DHT, or DHT plus 10  $\mu$ M of MDV3100 (+DHT/MDV), or DHT plus 500 nM of JQ1 (+DHT/JQ1).

**(E-F)** Averaged AR-FL, AR-V7 and BRD4 ChIP-Seq read density across the called peaks in 22Rv1 cells after the indicated treatment.

Fig. S2

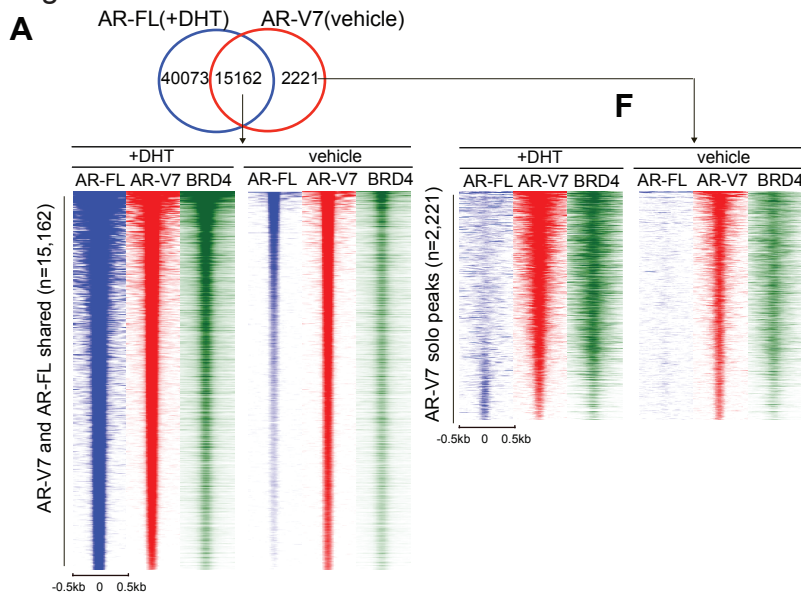

**B** AR-FL(+DHT) sites by the Homer de novo motif search

| Rank | Seq of motif | p value | %target | % background | Best match/details                            |
|------|--------------|---------|---------|--------------|-----------------------------------------------|
| 1    | AGAACAACTGT  | 1e-611  | 42.39%  | 6.94%        | MA0007.2_ARE<br>/Jaspar 0.934                 |
| 2    | TGTTIACITAGG | 1e-301  | 45.57%  | 17.32%       | FOXA1(Forkhead)<br>/Homer 0.929               |
| 3    | TCGTGTAC     | 1e-100  | 31.90%  | 15.80%       | FKH1/FKH2<br>/Yeast 0737                      |
| 4    | ACGACTG      | 1e-83   | 38.16%  | 22.03%       | MA0382.1_SKO1(dZIP)<br>/Jaspar 0.745          |
| 5    | TCCTGCCAA    | 1e-53   | 38.44%  | 25.26%       | MA0161.1_NFIC<br>/Jaspar 0.952                |
| 6    | TTATTCCT     | 1e-47   | 40.50%  | 27.84%       | MA0171.1_CG11085<br>/homeodomain/Jaspar 0.738 |
| 7    | GSAACITGCT   | 1e-29   | 11.40%  | 5.85%        | ovo/dmmpmm(Bergman)<br>/fly 0.736             |
| 8    | GCATAATTTGTG | 1e-21   | 0.45%   | 0.01%        | Antp/dmmpmm(SeSiMCMC)<br>/fly 0.664           |
| 9    | ACTGCCITCCG  | 1e-29   | 11.40%  | 5.85%        | Adf1/dmmpmm(Pollard)<br>/fly 0.623            |
| 10   | CTCGATTTCC   | 1e-21   | 0.45%   | 0.01%        | dl/dmmpmm(Noyes)<br>/fly 0.718                |

**C** AR-V7(+DHT) sites by the Homer de novo motif search

| Rank | Seq of motif | p value | %target | % background | Best match/details                   |
|------|--------------|---------|---------|--------------|--------------------------------------|
| 1    | AGAACAACTGT  | 1e-505  | 20.28%  | 5.05%        | MA0007.2_ARE<br>/Jaspar 0.934        |
| 2    | TGAGTAAATA   | 1e-425  | 31.14%  | 12.46%       | FOXA1(Forkhead)<br>/Homer 0.934      |
| 3    | TCCGCCCTAG   | 1e-182  | 22.56%  | 11.28%       | ZNF711/ZFX(Zf)<br>/Homer 0.876       |
| 4    | ITTCGGT      | 1e-114  | 22.60%  | 13.32%       | Pnt/dmmpmm(Papatsenko)<br>/fly 0.878 |
| 5    | GTTCGAACCCG  | 1e-62   | 1.56%   | 0.22%        | OPI1<br>/Yeast 0.817                 |
| 6    | CCGCCCATTT   | 1e-51   | 3.96%   | 1.50%        | YY1(Zf)<br>/Homer 0.902              |
| 7    | AGAAATATTTG  | 1e-47   | 1.78%   | 0.40%        | sd/dmmpmm(Bergman)<br>/fly 0.683     |
| 8    | TTCGCCG      | 1e-41   | 7.08%   | 3.84%        | SWI6((Harbison)<br>/yeast 0.900      |
| 9    | TCCGTAGG     | 1e-41   | 18.48%  | 13.14%       | ELF1(ETS)<br>/Homer 0.753            |
| 10   | CCATAAA      | 1e-40   | 5.36%   | 2.65%        | HOXD13(homeo domain)<br>/Homer 0.851 |

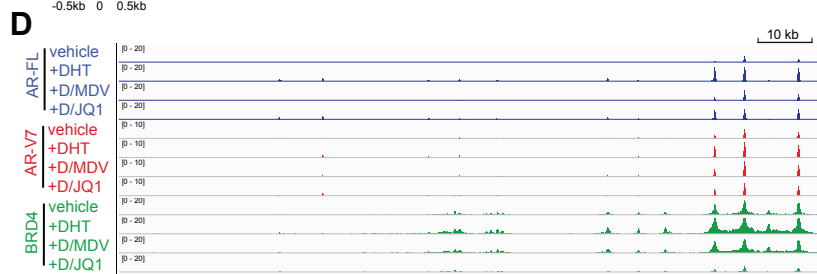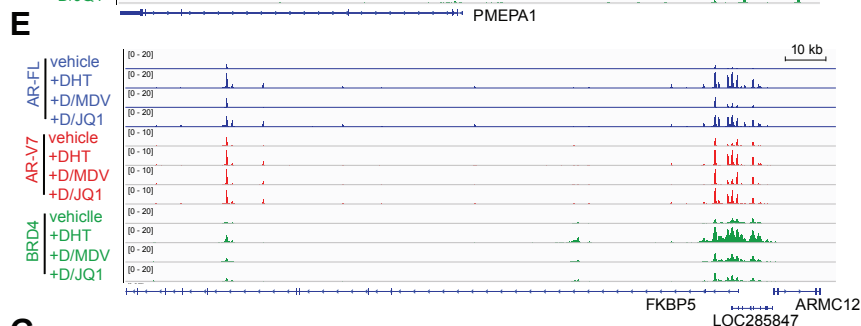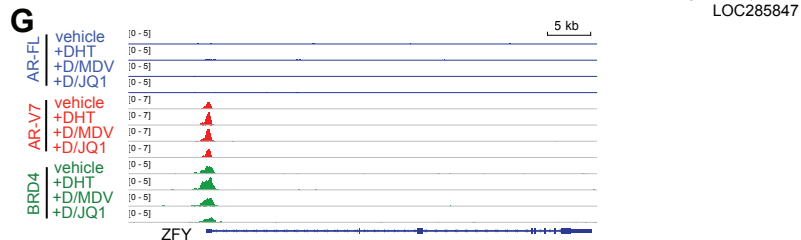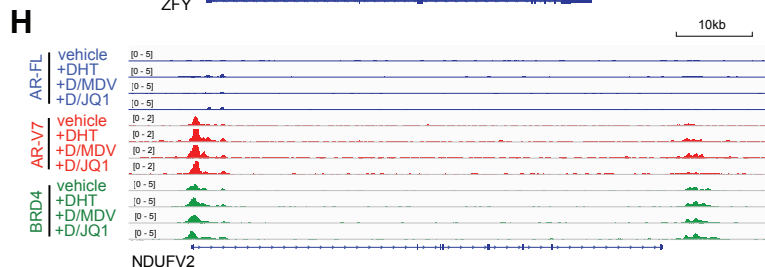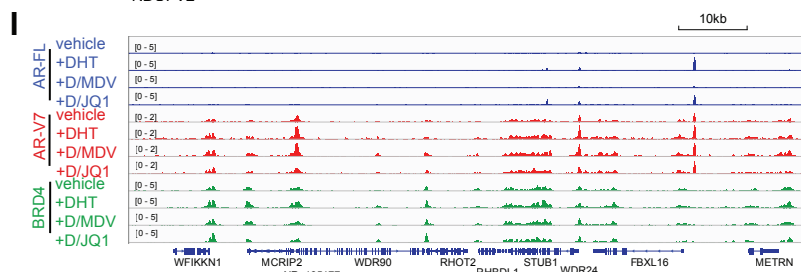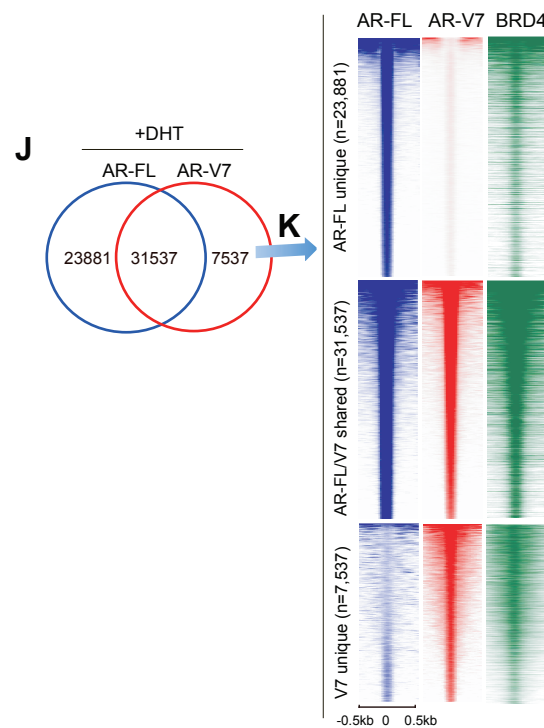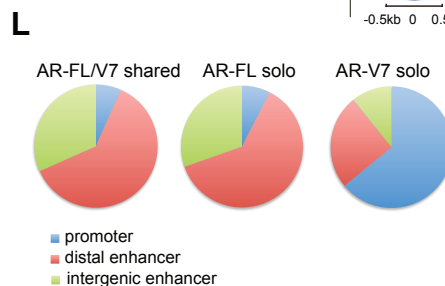

**Figure S2. ChIP-Seq reveals both the AR-FL/AR-V7 common binding sites and those unique to AR-V7 in 22Rv1 cells, Related to Figure 1**

**(A)** Venn diagram (top) and heatmap (bottom) showing ChIP-Seq peaks that are common to AR-V7 (red, middle column) in ligand-starved cells (vehicle) and AR-FL (blue, left column) in DHT-stimulated cells (+DHT), with the corresponding BRD4 binding (green) shown on the right column. Shown on each row of heatmap is ChIP-Seq signal density across  $\pm 0.5$ Kb from the center of a called peak, followed by ranking of the column based on density of AR-V7 binding in vehicle-treated cells.

**(B-C)** Top ranked motifs identified by Homer at either AR-FL (**B**) or AR-V7 (**C**) ChIP-seq peaks in 22Rv1 cells treated with DHT.

**(D-E)** ChIP-Seq profile reveals binding of AR-FL, AR-V7 and BRD4 at canonical AR target genes, PMEPA1 and FKBP5, in 22Rv1 cells, either ligand-starved (vehicle) or after the indicated treatment for 6 hours.

**(F)** Heatmap showing ChIP-Seq peaks unique to AR-V7 (red, middle column) in ligand-starved cells (vehicle) and lacking AR-FL binding (blue, left column) in the DHT-stimulated condition. Shown on each row of heatmap is ChIP-Seq signal density across  $\pm 0.5$ Kb from the center of a called peak, followed by ranking of the column based on density of AR-V7 binding. The corresponding BRD4 binding (green) at each peak is shown on the right.

**(G-I)** ChIP-Seq profiles reveal the unique binding of AR-V7 (red) and lacking AR-FL (blue) binding at the indicated gene promoters in 22Rv1 cells after drug treatment.

**(J-K)** Venn diagram (panel **J**) and heatmap (panel **K**) showing ChIP-Seq peaks defined as either AR-FL unique (**K**, top), common to AR-FL and AR-V7 (**K**, middle), or AR-V7 unique (**K**, bottom) in the 22Rv1 CRPC cells after DHT treatment. Shown on each row of heatmap is ChIP-Seq signal density across  $\pm 0.5$ Kb from the center of a called peak, followed by ranking of the column based on density of AR binding. The corresponding BRD4 binding at each peak is shown on the right column.

**(L)** Pie chart showing distribution of the indicated AR-FL and AR-V7 common and solo ChIP-Seq peaks as defined in panel **J** among promoters, distal enhancers or intergenic sites in the DHT-treated 22Rv1 cells.

Fig. S3

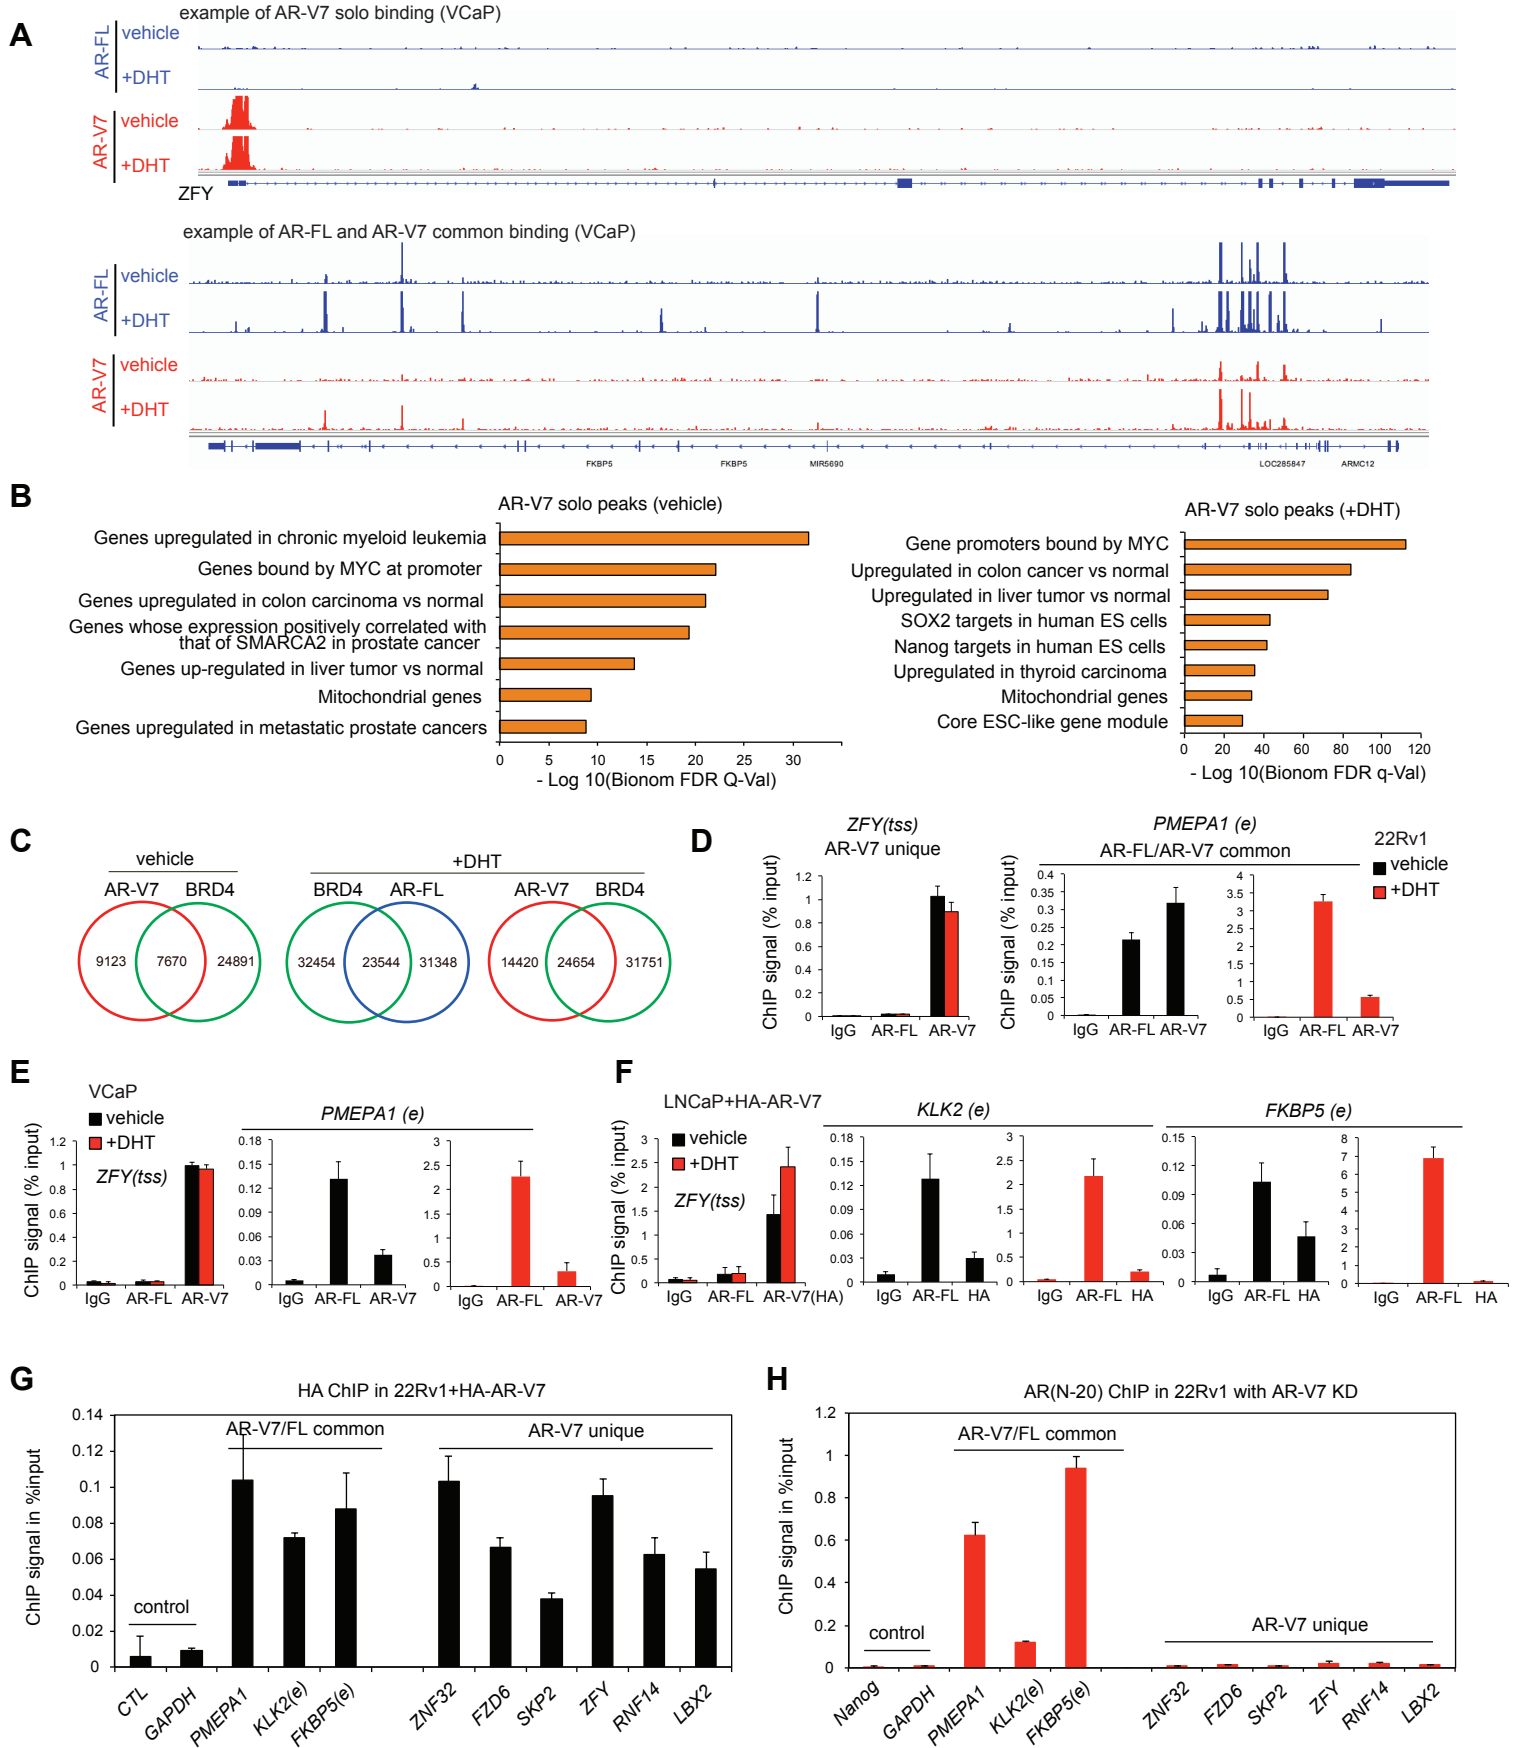

**Figure S3. Validation of AR-FL and AR-V7 common and unique binding with multiple independent CRPC cell models, Related to Figure 1.**

**(A)** ChIP-Seq profile examples show either the AR-FL (blue) and AR-V7 (red) common binding (bottom; FKBP5 ) or AR-V7 unique binding (top panel; the ZFY promoter) in VCaP cells.

**(B)** Genomic features of genes associated with AR-V7 solo binding. The Genomic Regions Enrichment of Annotations Tool (GREAT) ontology analysis reveals enrichment of the indicated signatures in genes associated with the AR-V7 solo binding peaks identified in either ligand-starved (left) or DHT-stimulated (right) 22Rv1 cells.

**(C)** Venn diagram showing overlap of BRD4 ChIP-Seq peaks with AR-FL or AR-V7 peaks in ligand-starved (left) or DHT-stimulated (right) 22Rv1 cells.

**(D-F)** ChIP-qPCR validation of the AR-V7 unique binding (left panel) and the AR-V7 and AR-FL common binding (right) at the indicated locus in three different CRPC cell lines, i.e., 22Rv1 (panel **D**), VCaP (**E**) and an HA-tagged AR-V7-overexpressing LNCaP cell line (**F**), under the ligand-starved (vehicle; black) or DHT-stimulated (+DHT; red) culture conditions. Plotted are ChIP signals from 3 independent experiments that are normalized to input and presented as mean  $\pm$  SD. tss, transcription start site; e, ARE enhancer. Note that the AR ChIP signals increased from mock to DHT-stimulated conditions.

**(G-H)** Independent approaches for ChIP verification using either anti-HA antibodies in 22Rv1 cells with stable expression of an HA-tagged AR-V7 (panel **G**) or using a pan-AR antibody (AR N-20; Santa Cruz Bio) in 22Rv1 cells with specific knock-down of AR-V7 isoform (panel **H**; see also Fig 2B) at the indicated genomic loci. 22Rv1 cells were ligand-starved followed by a 6-hour treatment with 10 nM of DHT.

Fig. S4

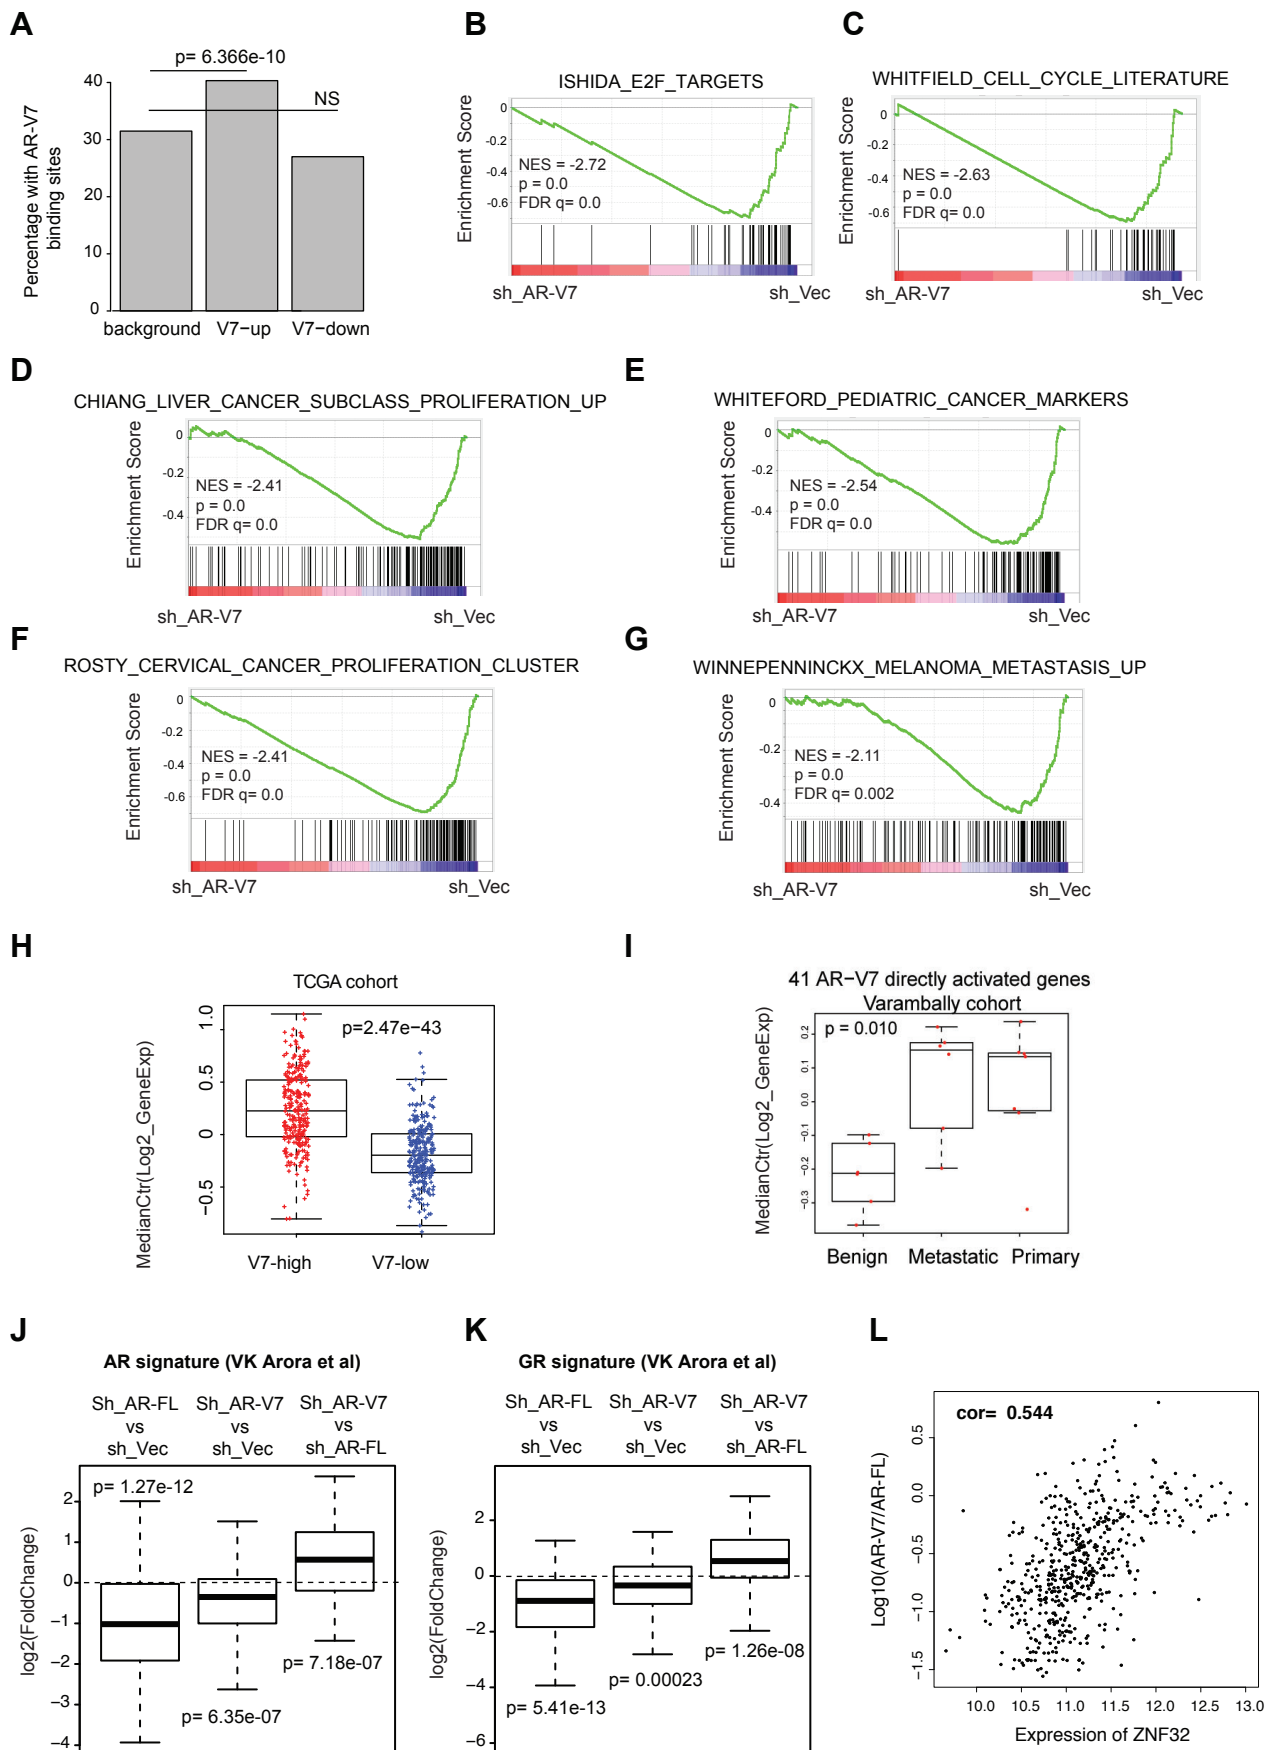



**Figure S4. Analysis of gene pathways affected by specific KD of either the AR-V7 or AR-FL isoform in 22Rv1 cells, Related to Figure 2-3.**

**(A)** Integration of ChIP-Seq and RNA-Seq data reveals that significantly more of the genes up-regulated by AR-V7 (V7-up) show direct binding of AR-V7, in comparison to randomized control (background) or genes down-regulated by AR-V7 (V7-down).

**(B-G)** GSEA shows negative correlation of the indicated cell proliferative (**B-C**) and cancer-related (**D-G**) genes with selective KD of AR-V7 (sh\_AR-V7), relative to mock (sh\_Vec).

**(H)** Boxplot of mean expression of the select 41 genes in AR-V7-high and low groups, separated by the median of AR-V7 expression level. These 41 genes are identified in a separate analysis to be directly up-regulated by AR-V7 in 22Rv1 cells and also positively correlated (spearman rank  $r > 0.2$  and BH FDR  $< 0.01$ ) with the AR-V7 expression level in the TCGA prostate cancer cohort (Cancer Genome Atlas Research, 2015). Gene expression values in boxplots were upper-quantile normalized, log<sub>2</sub> transformed and centered to its median. ANOVA test p-value was denoted on top.

**(I)** Box plots showing mean expression values of a 41-gene AR-V7 direct target signature (as defined in panel **H**) in a prostate cohort from the Varambally et al study (Varambally et al., 2008). Gene expression values (y-axis) were upper-quantile normalized, log<sub>2</sub> transformed and centered to its median.

**(J-K)** Changes in expression of the previously defined AR or GR signature genes (Arora et al., 2013) in ligand-starved 22Rv1 with selective KD of AR-V7 or AR-FL versus mock treatment (sh\_Vec). Plotted on y-axis are log<sub>2</sub>-converted fold-change values for the indicated comparison.

**(L)** Correlation analysis shows a positive relationship between ZNF32 and AR-V7 expression levels among the TCGA prostate cancer samples. Plotted on y-axis are the log<sub>10</sub> (the ratio of RNA-Seq tag number for cryptic exon to that for the common NTD exons), which is the calculated relative expression level for AR-V7. X-axis is the log<sub>2</sub> (up-quantile normalized read count of ZNF32).

Fig. S5

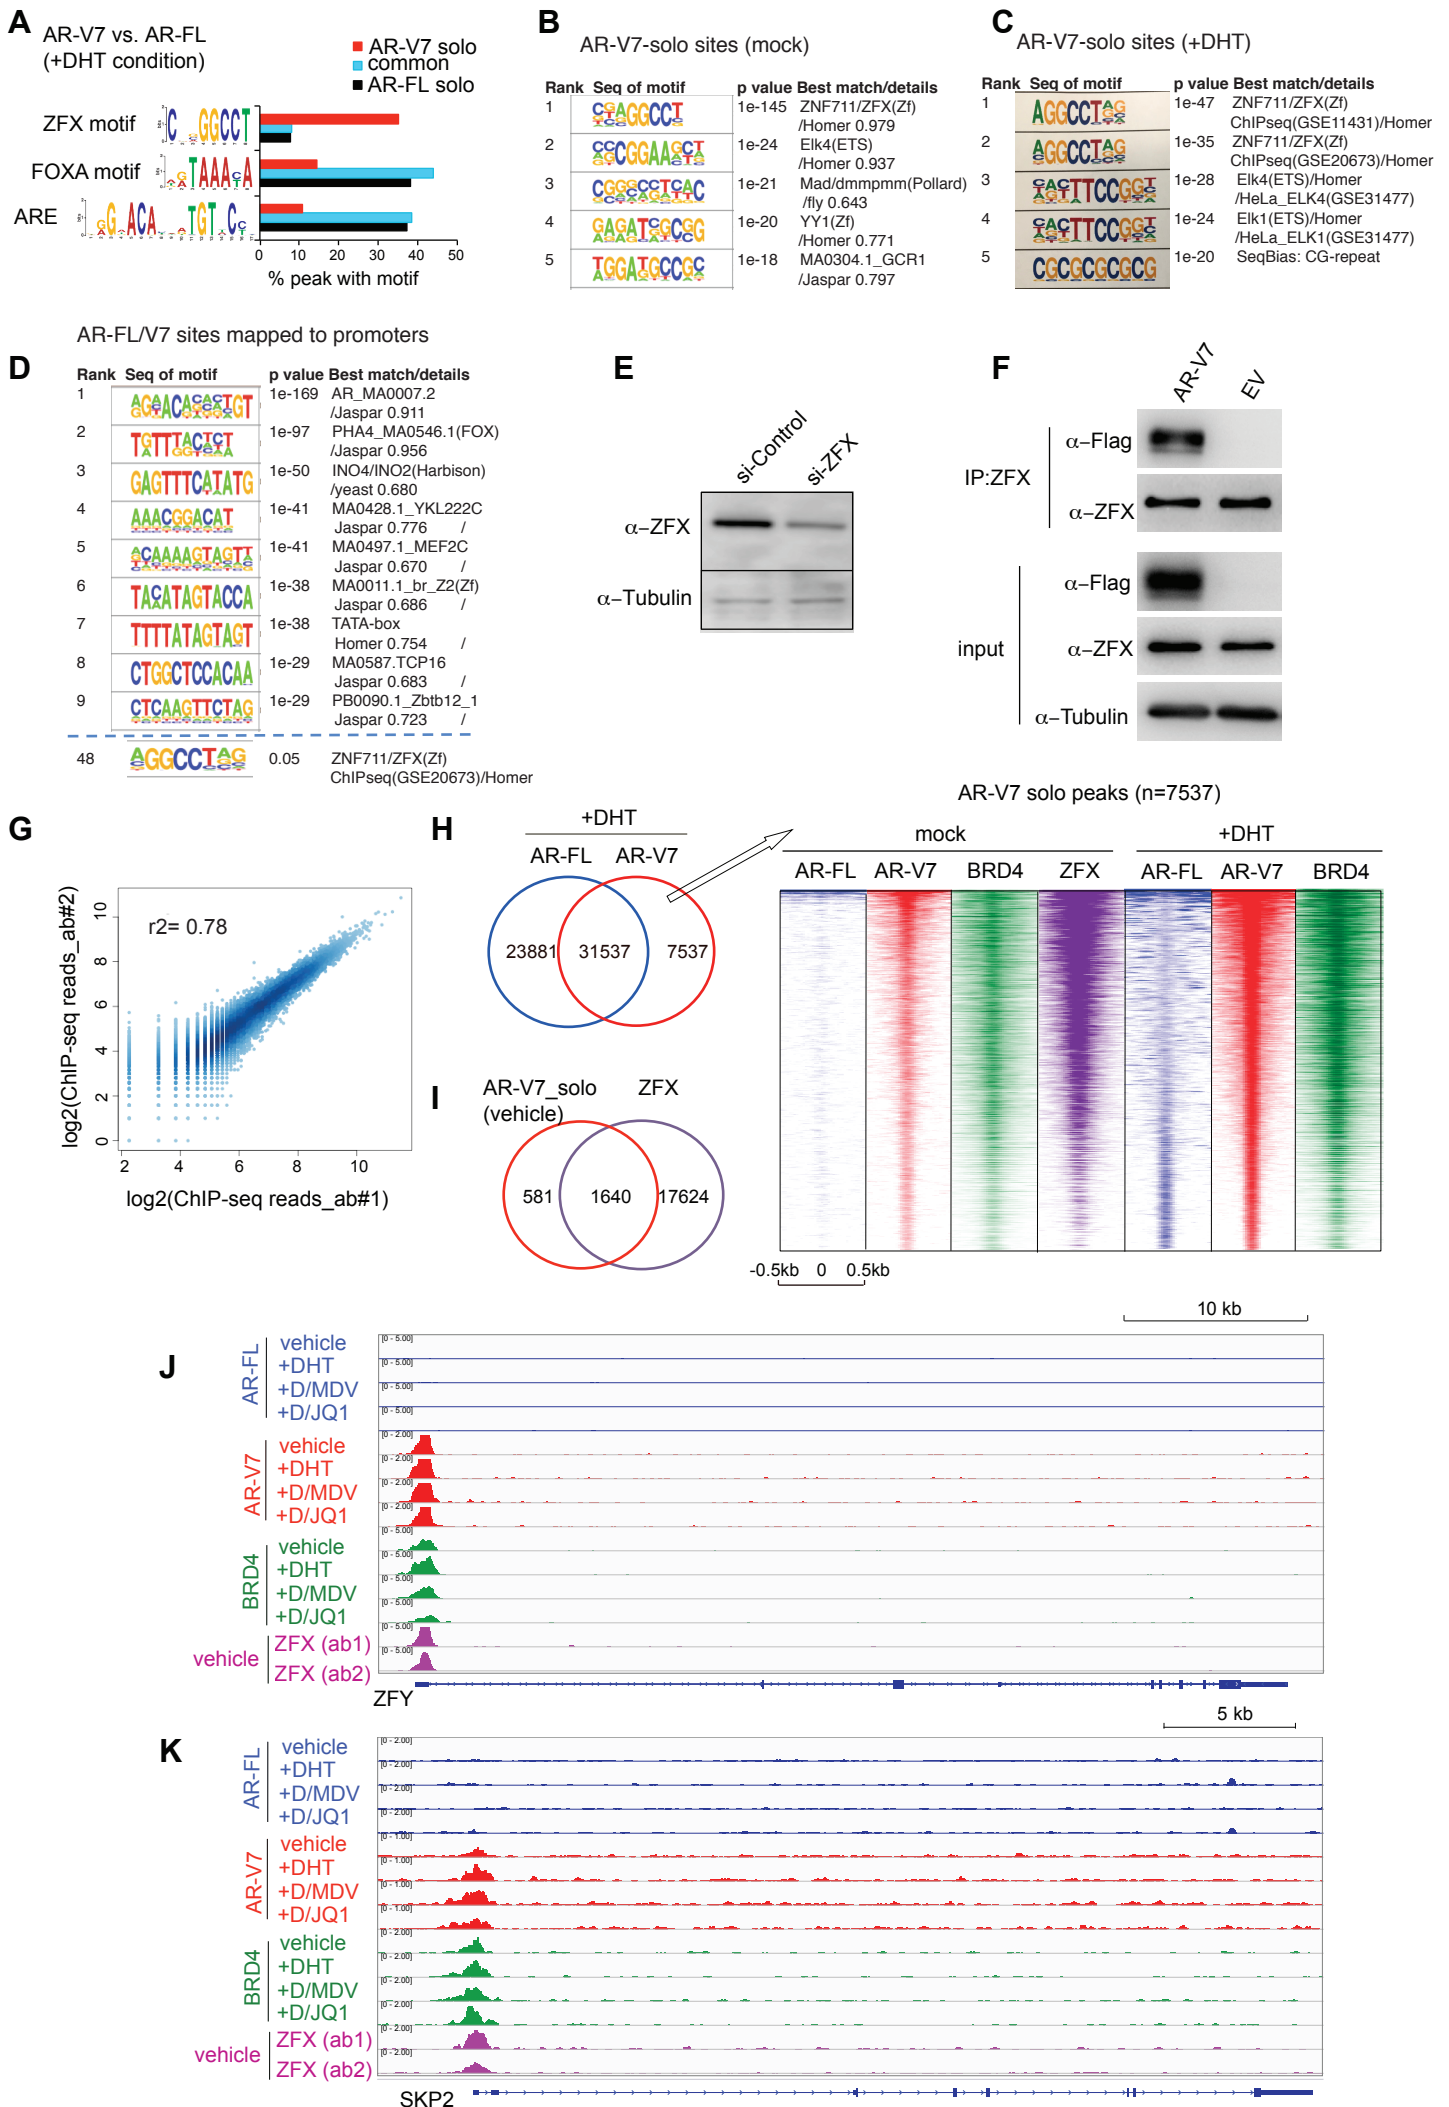

**Figure S5. ChIP-Seq reveals co-recruitment of ZFX to the AR-V7 solo binding sites in 22Rv1 cells, Related to Figure 4.**

**(A)** Percentage of AR-V7 unique (red), AR-FL/V7 common (cyan) or AR-FL unique (black) peaks that contain the indicated motif, as suggested by the HOMER motif search analysis using ChIP-Seq data from the DHT-stimulated 22Rv1 cells.

**(B-D)** Top ranked motifs identified by Homer at AR-V7 solo ChIP-seq peaks defined in either ligand-starved (**B**) or DHT-treated (**C**) 22Rv1 cells, as well as the 768 AR-FL/V7 common peaks mapped to promoter (**D**; the motif of ZFX in **D** here is ranked as 48<sup>th</sup> and not significantly enriched).

**(E)** Immunoblotting verifies specificity of the used ZFX antibodies in the 22RV1 cells after siRNA-mediated transient KD of ZFX (right), relative to mock (left).

**(F)** CoIP in 293 cells detects interaction of ZFX to the transiently transfected Flag-tagged AR-V7 (right). EV, empty vector.

**(G)** Correlation plot showing consistence of ChIP-Seq data generated with the two different ZFX antibodies used in the study.

**(H)** Venn diagram (left) and heatmap (right) showing the indicated ChIP-Seq signals at the peaks defined as unique to AR-V7 among the DHT-starved (left) and DHT-stimulated 22Rv1 cells (right). Shown on each row is ChIP-Seq signal density across  $\pm 0.5$ Kb from the center of a called peak, followed by ranking of the column based on density of AR-V7 binding. The corresponding BRD4 binding (green) at the peak is shown on the right column.

**(I)** Venn diagram illustrating overlap of ZFX peaks with AR-V7 solo binding peaks in the ligand-starved 22Rv1 cells.

**(J-K)** ChIP-Seq profiles of AR-FL, AR-V7, BRD and ZFX binding at the ZFY and SKP2 gene in 22Rv1 cells under the indicated treatment conditions.

Fig. S6

**A**

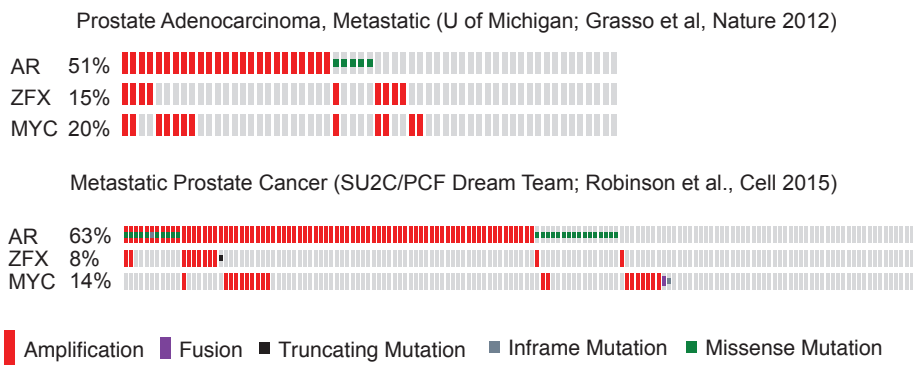

**B**

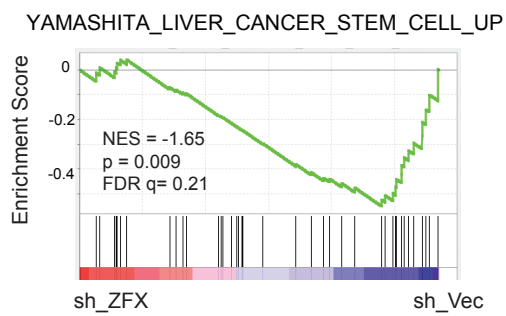

**C**

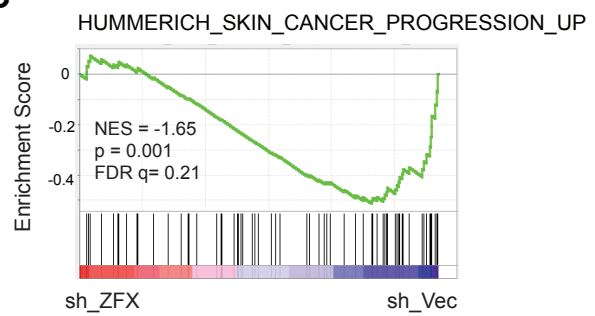

**D**

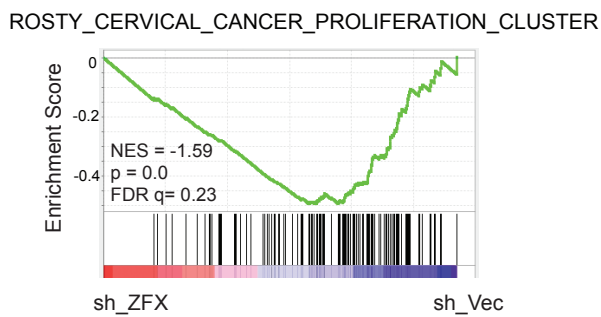

**E**

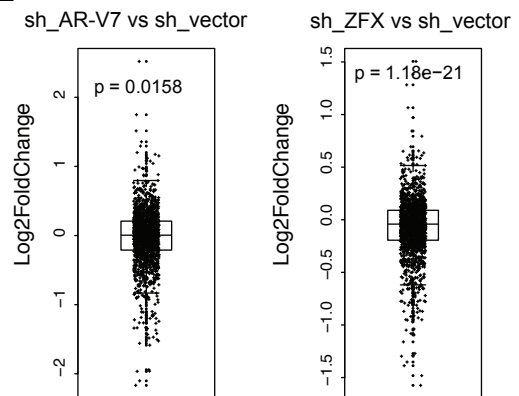

**Figure S6. ZFX shows gene amplification in prostate cancers and is required for AR-V7-mediated gene expression programs in the 22Rv1 cells, Related to Figure 5-6.**

**(A)** Amplification of AR, ZFX and MYC among various prostate cancer cohorts in the previous studies. Datasets of the indicated studies (Grasso et al., 2012; Kumar et al., 2016; Robinson et al., 2015) are extracted from cBioportal for Cancer Genomics (<http://www.cbioportal.org>).

**(B-D)** GSEA shows negative correlation of the indicated gene set to ZFX KD (sh\_ZFX), relative to mock (sh\_Vec).

**(E)** Box plots showing fold-change in expression of the 1603 genes associated with the defined AR-V7-solo peaks (see Table S5), as revealed by RNA-Seq profiles of 22Rv1 cells after KD of AR-V7 (left) or ZFX (right), relative to mock. Y-axis shows log<sub>2</sub>(fold change). Each dot in plot represents a gene.

Fig. S7

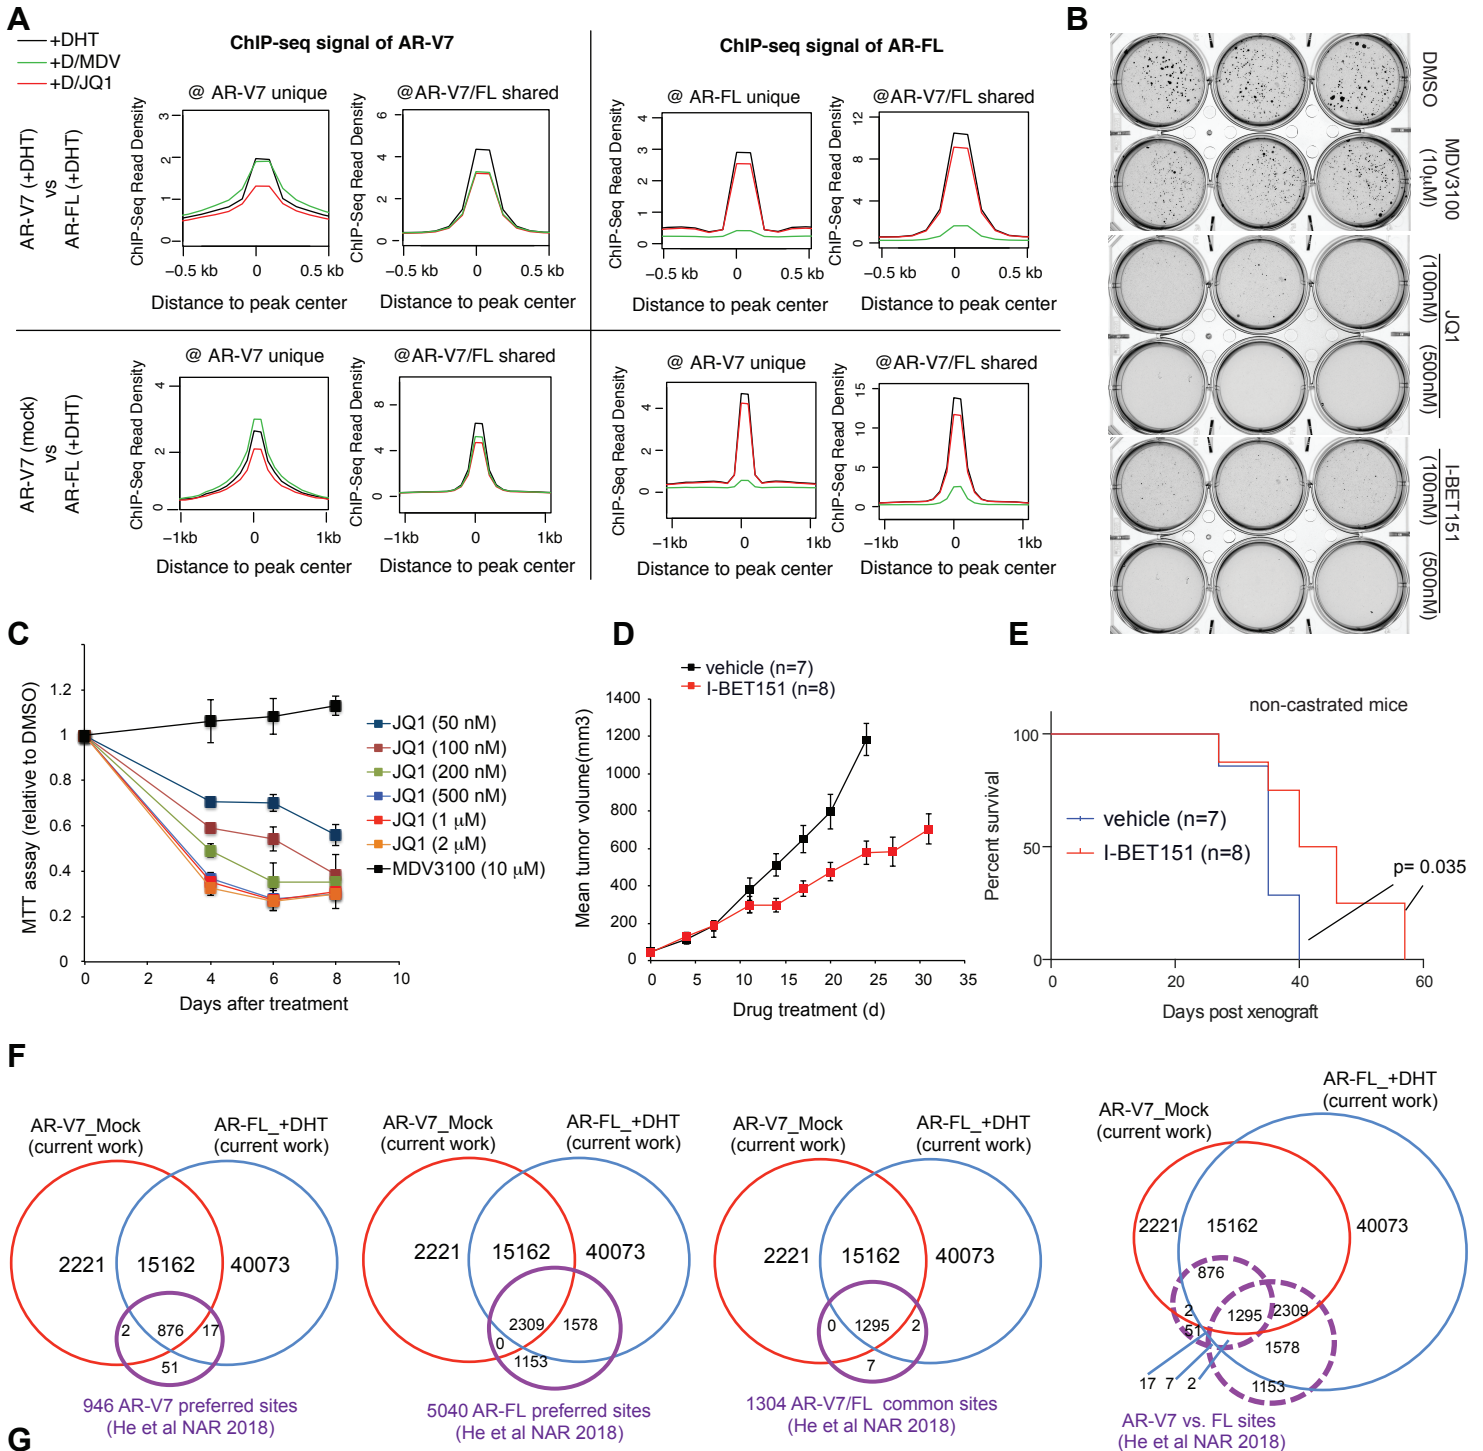

**Figure S7. Effects of compound treatment on AR-V7/FL binding, expression of AR-V7-associated signature genes and growth of 22Rv1 cells in vitro and in vivo, Related to Figure 7.**

**(A)** Averaged ChIP-Seq read density of AR-V7 (two panels on the left) or AR-FL (two panels on the right) at the AR-V7-solo peaks (1<sup>st</sup> and 3<sup>rd</sup> columns) or AR-FL/V7 shared peaks (2<sup>nd</sup> and 4<sup>th</sup> columns). The determination of AR-V7 solo binding is based on AR-V7 binding identified in either DHT-treated (top panel) or ligand-starved (bottom) 22Rv1 cells, relative to AR-FL peaks in DHT-treated 22Rv1 cells.

**(B)** Colony formation of 22Rv1 cells under the indicated treatment condition.

**(C)** MTT assays measuring effect of the indicated compound treatment on in vitro proliferation of 22Rv1 cells cultured under ligand-starved conditions. Plotted are data sets of 3 independent experiments after normalization to the corresponding vehicle controls.

**(D)** In vivo growth of 22Rv1 cells xenografted in non-castrated NSG mice, followed by the indicated treatment. n, size of cohort.

**(E)** Kaplan-Meier curve of non-castrated NSG mice after subcutaneous inoculation of 22Rv1 cells and the indicated treatment. n, size of cohort; NS, not significant.

**(F)** Venn diagrams comparing the ChIP-Seq peaks of AR-V7 (ligand-starved, top/red) and AR-FL (DHT-treated, top/blue) identified in 22Rv1 cells by the current work with the AR-V7-preferred (1<sup>st</sup> panel, bottom/purple), AR-FL-preferred (2<sup>nd</sup> panel, bottom/purple) or common peaks (3<sup>rd</sup> panel, bottom/purple) as reported by a recent work (He et al., 2018) in 22Rv1 cells. Right panel shows overall comparison for AR-V7/FL sites reported by the two studies.

**(G)** Summary of the total number of pan-AR, AR-FL-specific and AR-V7-specific ChIP-Seq peaks reported in recent studies (Asangani et al., 2014; He et al., 2018) and this current work, with the information of the used cells, antibody and dataset listed.

**Table S3. 41 AR-V7 directly activated genes in 22Rv1 cell that positively correlate to the AR-V7 level in the TCGA prostate cancer patient cohort, Related to Figure 2.**

\* V7.log2FC, log2 value of fold change in expression for sh\_AR\_V7 vs sh\_Vector in 22Rv1 cells;

padj, adjusted p value; V7peaks, existence of a called AR-V7 ChIP-seq peak in 22Rv1 cells.

| Symbol    | entrez ID | description                                                             | V7.log2FC*   | V7.pvalue   | V7.padj     | V7peaks |
|-----------|-----------|-------------------------------------------------------------------------|--------------|-------------|-------------|---------|
| ALB       | 213       | albumin [Source:HGNC Symbol;Acc:HGNC:399]                               | -1.834732153 | 1.51E-93    | 7.56E-91    | yes     |
| ANKRD16   | 54522     | ankyrin repeat domain 16 [Source:HGNC Symbol;Acc:HGI-0.839958619        |              | 3.86E-05    | 0.000229658 | yes     |
| BCAS4     | 55653     | breast carcinoma amplified sequence 4 [Source:HGNC Sy -0.908526197      |              | 0.00079286  | 0.003341616 | yes     |
| BIRC5     | 332       | baculoviral IAP repeat containing 5 [Source:HGNC Symbo -1.01325133      |              | 2.13E-17    | 6.45E-16    | yes     |
| C14orf166 | 51637     | chromosome 14 open reading frame 166 [Source:HGNC 5 -1.150385031        |              | 2.49E-26    | 1.48E-24    | yes     |
| CCBL1     | 883       | cysteine conjugate-beta lyase, cytoplasmic [Source:HGNC -0.665250828    |              | 0.002383626 | 0.008698995 | yes     |
| CHKA      | 1119      | choline kinase alpha [Source:HGNC Symbol;Acc:HGNC:19 -0.671872884       |              | 9.86E-05    | 0.000531377 | yes     |
| CMTM7     | 112616    | CKLF-like MARVEL transmembrane domain containing 7 [-0.78996647         |              | 0.002755252 | 0.009923438 | yes     |
| CNIH4     | 29097     | cornichon family AMPA receptor auxiliary protein 4 [Sour -0.627393764   |              | 6.71E-09    | 7.71E-08    | yes     |
| COPS7B    | 64708     | COP9 signalosome subunit 7B [Source:HGNC Symbol;Acc -0.994714761        |              | 6.70E-17    | 1.95E-15    | yes     |
| DSN1      | 79980     | DSN1 homolog, MIS12 kinetochore complex component -0.643876483          |              | 1.45E-06    | 1.15E-05    | yes     |
| ETHE1     | 23474     | ethylmalonic encephalopathy 1 [Source:HGNC Symbol;Ac -0.980144463       |              | 1.89E-05    | 0.000120547 | yes     |
| EVL       | 51466     | Enah/Vasp-like [Source:HGNC Symbol;Acc:HGNC:20234] -1.116843248         |              | 9.11E-10    | 1.19E-08    | yes     |
| FAM174B   | 400451    | family with sequence similarity 174, member B [Source:H -0.60782139     |              | 0.001157403 | 0.004652853 | yes     |
| FAM200B   | 285550    | family with sequence similarity 200, member B [Source:H -0.582412747    |              | 0.000560362 | 0.0024625   | yes     |
| FDX1      | 2230      | ferredoxin 1 [Source:HGNC Symbol;Acc:HGNC:3638] -0.644009545            |              | 2.62E-05    | 0.000162299 | yes     |
| HMGB1     | 3146      | high mobility group box 1 [Source:HGNC Symbol;Acc:HGI -0.711584313      |              | 1.18E-22    | 5.34E-21    | yes     |
| HPN       | 3249      | hepsin [Source:HGNC Symbol;Acc:HGNC:5155] -0.621739442                  |              | 3.00E-07    | 2.66E-06    | yes     |
| IGFBP2    | 3485      | insulin-like growth factor binding protein 2, 36kDa [Sourc -0.705227281 |              | 4.61E-17    | 1.37E-15    | yes     |
| ITPK1     | 3705      | inositol-tetrakisphosphate 1-kinase [Source:HGNC Symbc -0.627102081     |              | 2.26E-13    | 4.66E-12    | yes     |
| KIF12     | 113220    | kinesin family member 12 [Source:HGNC Symbol;Acc:HGI -0.629184444       |              | 1.75E-09    | 2.20E-08    | yes     |
| KLKP1     | 606293    | kallikrein pseudogene 1 [Source:HGNC Symbol;Acc:HGNC -1.934951544       |              | 6.03E-09    | 7.00E-08    | yes     |
| MEGF6     | 1953      | multiple EGF-like-domains 6 [Source:HGNC Symbol;Acc:H -0.757042584      |              | 3.06E-07    | 2.71E-06    | yes     |
| MESP1     | 55897     | mesoderm posterior bHLH transcription factor 1 [Source: -1.441258524    |              | 4.44E-10    | 6.06E-09    | yes     |
| MMAB      | 326625    | methylmalonic aciduria (cobalamin deficiency) cblB type -0.830484514    |              | 2.18E-16    | 6.12E-15    | yes     |
| MMP24     | 10893     | matrix metalloproteinase 24 (membrane-inserted) [Sourc -0.767168041     |              | 9.35E-12    | 1.55E-10    | yes     |
| MSI1      | 4440      | musashi RNA-binding protein 1 [Source:HGNC Symbol;Ac -0.861063611       |              | 1.05E-10    | 1.54E-09    | yes     |
| MTMR7     | 9108      | myotubularin related protein 7 [Source:HGNC Symbol;Ac -1.241774191      |              | 0.000210603 | 0.00103521  | yes     |
| PIGY      | 84992     | phosphatidylinositol glycan anchor biosynthesis, class Y [-0.719569794  |              | 7.68E-11    | 1.15E-09    | yes     |
| PKDCC     | 91461     | protein kinase domain containing, cytoplasmic [Source:H -0.832289195    |              | 0.002472854 | 0.009000332 | yes     |
| RFC2      | 5982      | replication factor C (activator 1) 2, 40kDa [Source:HGNC -0.721630136   |              | 3.29E-14    | 7.48E-13    | yes     |



|          |        |                                                                                                 |           |             |     |
|----------|--------|-------------------------------------------------------------------------------------------------|-----------|-------------|-----|
| RPL27A   | 6157   | ribosomal protein L27a [Source:HGNC Symbol;Acc:HGNC -0.670435785                                | 8.37E-22  | 3.64E-20    | yes |
| SERPINB6 | 5269   | serpin peptidase inhibitor, clade B (ovalbumin), member -0.663143102                            | 1.33E-13  | 2.82E-12    | yes |
| SETMAR   | 6419   | SET domain and mariner transposase fusion gene [Source:HGNC Symbol;Acc:HGNC -0.829128454        | 8.20E-06  | 5.63E-05    | yes |
| SNRPB    | 6628   | small nuclear ribonucleoprotein polypeptides B and B1 [Source:HGNC Symbol;Acc:HGNC -0.652632268 | 8.88E-15  | 2.13E-13    | yes |
| SPINK1   | 6690   | serine peptidase inhibitor, Kazal type 1 [Source:HGNC Symbol;Acc:HGNC -0.764530062              | 5.52E-16  | 1.46E-14    | yes |
| TMEM70   | 54968  | transmembrane protein 70 [Source:HGNC Symbol;Acc:HGNC -0.671226218                              | 5.44E-06  | 3.89E-05    | yes |
| TP53TG1  | 11257  | NA -1.004931743                                                                                 | 2.47E-15  | 6.21E-14    | yes |
| TPRG1L   | 127262 | tumor protein p63 regulated 1-like [Source:HGNC Symbol;Acc:HGNC -0.867837728                    | 3.12E-19  | 1.11E-17    | yes |
| VRK1     | 7443   | vaccinia related kinase 1 [Source:HGNC Symbol;Acc:HGNC -0.611836795                             | 0.0026273 | 0.009509802 | yes |
| ZNF32    | 7580   | zinc finger protein 32 [Source:HGNC Symbol;Acc:HGNC:1 -0.966237289                              | 9.79E-07  | 7.95E-06    | yes |

---

**Table S6. Information of oligos or shRNA used in the study, Related to Figure 1-7 and STAR Methods.**

| <b>ChIP-qPCR Primer</b>             | <b>Sequence</b>          | <b>Reference</b> |
|-------------------------------------|--------------------------|------------------|
| control region (Irrelevant)-forward | AATCTAGCTGATATAGTGTGGCTC | Guo et al (2009) |
| control region (Irrelevant)-reverse | AAGCATACACTTACACGGCACTCC |                  |
| FKBP5-enhancer (e)-forward          | GCTGCTGCAGGATAAAGGTC     |                  |
| FKBP5-enhancer (e)-reverse          | ATGGAGTGCAGGTTGGAGAG     |                  |
| FZD6-tss-forward                    | CGCGGGTAATTCGTAATCC      |                  |
| FZD6-tss-reverse                    | AGGAAAGTGCGCAAATCTGT     |                  |
| hGAPDH-tss-f                        | TCTCCCCACACACATGCACTT    |                  |
| hGAPDH-tss-r                        | CCTAGTCCCAGGGCTTTGATT    |                  |
| KLK2 enhancer ARE(e)-forward        | GTTGAAAGCAGACCTACTCTGGA  | Guo et al (2009) |
| KLK2 enhancer ARE(e)-reverse        | CTGGACCATCTTTTCAAGCAT    |                  |
| KLK2 promoter ARE-f                 | GAGAATGCCTCCAGACTGAT     | Guo et al (2009) |
| KLK2 promoter ARE-r                 | CTTGCCCTGTTGGCACCTA      |                  |
| KLK3 enhancer (e) -forward          | TGAGAAACCTGAGATTAGGA     |                  |
| KLK3 enhancer (e) -reverse          | ATCTCTCTCAGATCCAGGCT     |                  |
| LBX2-f                              | CAGTGCTAAGCTGCACAGGA     |                  |
| LBX2-r                              | AGGTGGTCACTTGGTTCCAG     |                  |
| NANOG promoter/tss-f                | GAGGGGTGGGTCTAAGGTGA     |                  |
| NANOG promoter/tss-r                | ATGAGGCAACCAGCTCAGTC     |                  |
| PMEPA1 enhancer (e)-forward         | AAACAGAAGGTGGGAGACAAA    |                  |
| PMEPA1 enhancer (e)-reverse         | TACCCTGGCTAAAGCAGTTTC    |                  |
| SKP2-promoter(tss)-f                | AATCTTTTAGGCCGCGAAT      |                  |
| SKP2-promoter(tss)-r                | GCACTAAGGCATCCATCCAT     |                  |
| ZFY-tss-forward                     | AAGGCAGTTGATGGACCTGG     |                  |
| ZFY-tss-reverse                     | TCCCCTTCGCGGACATTTAC     |                  |
| ZNF32-tss-forward                   | GTCCTGAACCTCGGCATC       |                  |
| ZNF32-tss-reverse                   | CGCCAAGGAAATGAGCAG       |                  |

| <b>RT-qPCR Primer</b> | <b>Sequence</b>             | <b>Reference</b> |
|-----------------------|-----------------------------|------------------|
| AR-V7-RT-forward      | CTACTCCGGACCTTACGGGGACATGCG | Guo et al (2009) |
| AR-V7-RT-reverse      | TGCCAACCCGGAATTTTTCTCCC     |                  |
| AR(3'UTR)-RT-f        | CCATGGCACCTTCAGACTTT        |                  |
| AR(3'UTR)-RT-r        | ACTGGGCCATATGAGGATCA        |                  |
| FKBP5-RT-f            | CAGATCTCCATGTGCCAGAA        |                  |
| FKBP5-RT-r            | CTTGCCATTGCTTTATTGG         |                  |
| FOXA1-RT-f            | GAAGATGGAAGGGCATGAAA        |                  |
| FOXA1-RT-r            | GCCTGAGTTCATGTTGCTGA        |                  |
| FZD6-RT-f             | TTGTTGGCATCTCTGCTGTC        |                  |
| FZD6-RT-r             | TCTTCGACTTTTACTGATTGGA      |                  |
| GAPDH-RT-f            | GAAGGTGAAGGTCTGGAGTCA       |                  |
| GAPDH-RT-r            | AATGAAGGGGTCATTGATGG        |                  |
| HDAC3-RT-f            | CTGGTCCTGCATTACGGTCT        |                  |
| HDAC3-RT-r            | TATTGGTGGGGCTGACTCTC        |                  |
| IDH2-RT-f             | TGGTGATGAGATGACCCGTA        |                  |

|               |                          |
|---------------|--------------------------|
| IDH2-RT-r     | GGAGCCCGAGGTCAAATAC      |
| KLK2-RT-f     | GGCTCTGGACAGGTGGTAAA     |
| KLK2-RT-r     | GCCCCATGATGTGATACCTT     |
| KLK3/PSA-RT-f | ACTTCAGTGTGTGGACCTCCATGT |
| KLK3/PSA-RT-r | AGCACACAGCATGAACTTGGTCAC |
| PHF21B-RT-f   | AAAGAAAGACGAGGGTGTGC     |
| PHF21B-RT-r   | GCAGCTTCTGCTTCTCCTCT     |
| PMEPA1-RT-f   | TGCAACTGCAAACGCTCTTT     |
| PMEPA1-RT-r   | CCACCACCATCACCATCATC     |
| SKP2-RT-f     | TCCCTGAGCTGCTAAAGGTC     |
| SKP2-RT-r     | CAACCGACCAGTCACATCC      |
| ZFX-RT-f      | CGTAGGAGAGGAGGATGCTG     |
| ZFX-RT-r      | TTCCGGTTTTCAATTCCATC     |
| ZNF32-RT-f    | TGGATTTCCAACAGCTACCC     |
| ZNF32-RT-r    | ATTTGTGGTGGGCTTCAGTC     |

| shRNA in pLKO.1-puro | Target sequence       | Clone ID (Sigma) |
|----------------------|-----------------------|------------------|
| sh-FZD6#1            | CCACCCATTGATTGTATTATA | TRCN0000008338   |
| sh-FZD6#2            | CCCATGTCCTTATCAGGCAAA | TRCN0000008339   |
| sh-ZFX#1             | CCAATCAGTCTCATTACATA  | TRCN0000017308   |
| sh-ZFX#2 **          | GTCGGAAATTGATCCTTGTA  | TRCN0000017309   |
| sh-ZFX#3             | AGTGATTTGAAACGACACATA | TRCN0000017310   |
| sh-ZNF32#1           | CCTGAAGAGAAGTTCTCTTA  | TRCN0000014923   |
| sh-ZNF32#2           | GAAACCCTACGAGTGTGCTAT | TRCN0000014926   |

\*\* , sh2 of ZFX used for functional work
